# Supplementary material for: Performance of Existing Definitions and Tests for the Diagnosis of Invasive Fungal Diseases other than Invasive Candidiasis and Invasive Aspergillosis in Critically Ill, Adult Patients: A Systematic Review with Qualitative Evidence Synthesis
Source: MDPI journal article supplement (doi:10.3390/jof7030176), 2021-02-28
Supplement: s1 [file s1]

# Supplementary material

## Search strings

### Search 1

#### **Pubmed**

("fungemia"[Mesh:Noexp] OR "Invasive Fungal Infections" OR "Invasive Fungal Infection" OR "Pneumonia, Pneumocystis" [Mesh] OR Pneumocyst\* OR "Pneumocystis Pneumonia" OR "Pneumocystis Pneumonias") AND (definition\* OR criter\* OR guideline\* OR Recommendation\*)

#### **CINAHL**

("fungemia"[Mesh:Noexp] OR "Invasive Fungal Infection" OR "Invasive Fungal Infections" OR "Pneumonia, Pneumocystis" [Mesh] OR Pneumocyst\* OR "Pneumocystis Pneumonia" OR "Pneumocystis Pneumonias") AND (definition\* OR criter\* OR guideline\* OR Recommendation\*)

#### **Cochrane**

("fungemia"[Mesh:Noexp] OR "Invasive Fungal Infection" OR "Invasive Fungal Infections" OR "Pneumonia, Pneumocystis" [Mesh] OR Pneumocyst\* OR "Pneumocystis Pneumonia" OR "Pneumocystis Pneumonias") AND (definition\* OR criter\* OR guideline\* OR Recommendation\*)

#### **Embase**

('fungemia'/de OR 'Invasive Fungal Infection':ti, ab, kw OR 'pneumocystosis'/exp OR Pneumocyst\*:ti, ab, kw OR 'Pneumocystis Pneumonia':ti, ab, kw) AND (definition\*:ti, ab, kw OR criter\*:ti, ab, kw OR guideline\*:ti, ab, kw OR Recommendation\*:ti, ab, kw)

### Search 2

#### **PubMed**

("fungemia"[Mesh:Noexp] OR "Invasive Fungal Infection" OR "Invasive Fungal Infections" OR "Cryptococcosis"[Mesh] OR "Histoplasmosis"[Mesh] OR "Zygomycosis"[Mesh] OR "Hyalohyphomycosis"[Mesh] OR Cryptococc\* OR Zygomycos\* OR Mucor\* OR Histoplasm\* OR Fusari\* OR "Scedosporium"[Mesh] OR Scedospor\* OR Hyalohyphomycosis) AND (definition\* OR criter\* OR guideline\* OR Recommendation\*)

#### **CINAHL**

("fungemia"[Mesh:Noexp] OR "Invasive Fungal Infection" OR "Invasive Fungal Infections" OR "Cryptococcosis"[Mesh] OR "Histoplasmosis"[Mesh] OR "Zygomycosis"[Mesh] OR Cryptococc\* OR Zygomycos\* OR Mucor\* OR Histoplasm\* OR Fusari\* OR Scedospor\* OR hyalohyphomycos\*) AND (definition\* OR criter\* OR guideline\* OR Recommendation\*)

#### **Cochrane**

("fungemia"[Mesh:Noexp] OR "Invasive Fungal Infection" OR "Invasive Fungal Infections" OR "Cryptococcosis"[Mesh] OR "Histoplasmosis"[Mesh] OR "Zygomycosis"[Mesh] OR "Hyalohyphomycosis"[Mesh] OR Cryptococc\* OR Zygomycos\* OR Mucor\* OR Histoplasm\* OR Fusari\* OR Scedospor\* OR "Scedosporium"[Mesh]) AND (definition\* OR criter\* OR guideline\* OR Recommendation\*)

#### **Embase**

('fungemia'/de OR 'Invasive Fungal Infection':ti, ab, kw OR 'cryptococcosis'/mj OR 'histoplasmosis'/mj OR 'zygomycosis'/mj OR 'mucormycosis'/mj OR 'hyalohyphomycosis'/mj OR cryptococc\*:ti, ab, kw OR zygomycos\*:ti, ab, kw OR mucor\*:ti, ab, kw OR histoplasm\*:ti, ab, kw OR Fusari\*:ti, ab, kw OR Scedospor\*:ti, ab, kw OR 'Scedosporium'/mj) AND (definition\*:ti, ab, kw OR criter\*:ti, ab, kw OR guideline\*:ti, ab, kw OR recommendation\*:ti, ab, kw)
